# Supplementary material
Source: PubMed Central journal article supplement (PMC9207558)
Supplement: NIHMS1814940-supplement-SI.pdf [file NIHMS1814940-supplement-SI.pdf]

# Supporting Information

## **Inactivated Cowpea mosaic virus in combination with OX40 agonist primes potent anti-tumor immunity in bilateral melanoma mouse model**

*Edward C. Koellhoffer<sup>1</sup>, Chenkai Mao<sup>2</sup>, Veronique Beiss<sup>3</sup>, Lu Wang<sup>4</sup>, Steven N. Fiering<sup>2,5</sup>,  
Christine E. Boone<sup>\*1</sup>, Nicole F. Steinmetz<sup>1,3,4,6,7,8\*</sup>*

<sup>1</sup>Department of Radiology, University of California, San Diego, La Jolla CA 92093, United States; <sup>2</sup>Department of Microbiology and Immunology, Geisel School of Medicine, Dartmouth College, Hanover, NH 03755 United States; <sup>3</sup>Department of NanoEngineering, University of California, San Diego, La Jolla CA 92093, United States; <sup>4</sup>Department of Bioengineering, University of California, San Diego, La Jolla CA 92093, United States; <sup>5</sup>Norris Cotton Cancer Center, Geisel School of Medicine and Dartmouth Hitchcock Medical System, NH 03755 United States; <sup>6</sup>Moores Cancer Center, University of California, San Diego, La Jolla CA 92093, United States; <sup>7</sup>Center for Nano-ImmunoEngineering, University of California, San Diego, La Jolla CA 92093, United States; <sup>8</sup>Institute for Materials Design and Discovery, University of California, San Diego, La Jolla CA 92093, United States

### **\* Co-Corresponding authors:**

Christine E. Boone, M.D., Ph.D. [ceboone@health.ucsd.edu](mailto:ceboone@health.ucsd.edu) and Nicole F. Steinmetz, Ph.D., [nsteinmetz@ucsd.edu](mailto:nsteinmetz@ucsd.edu)

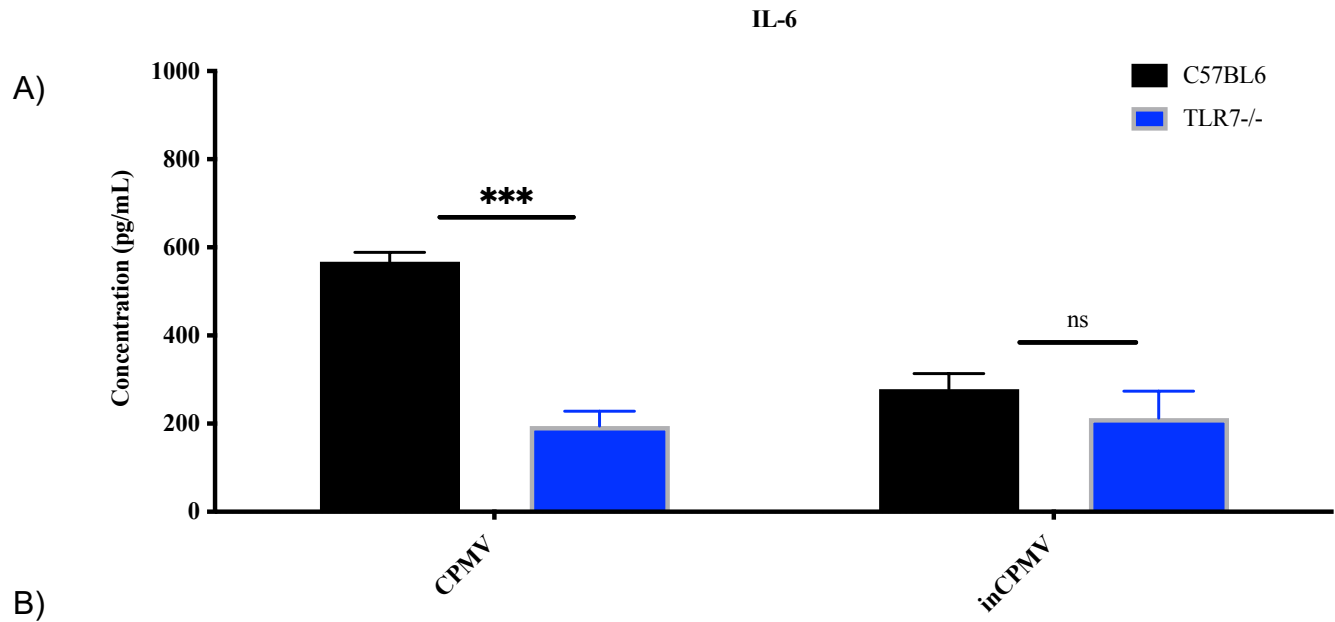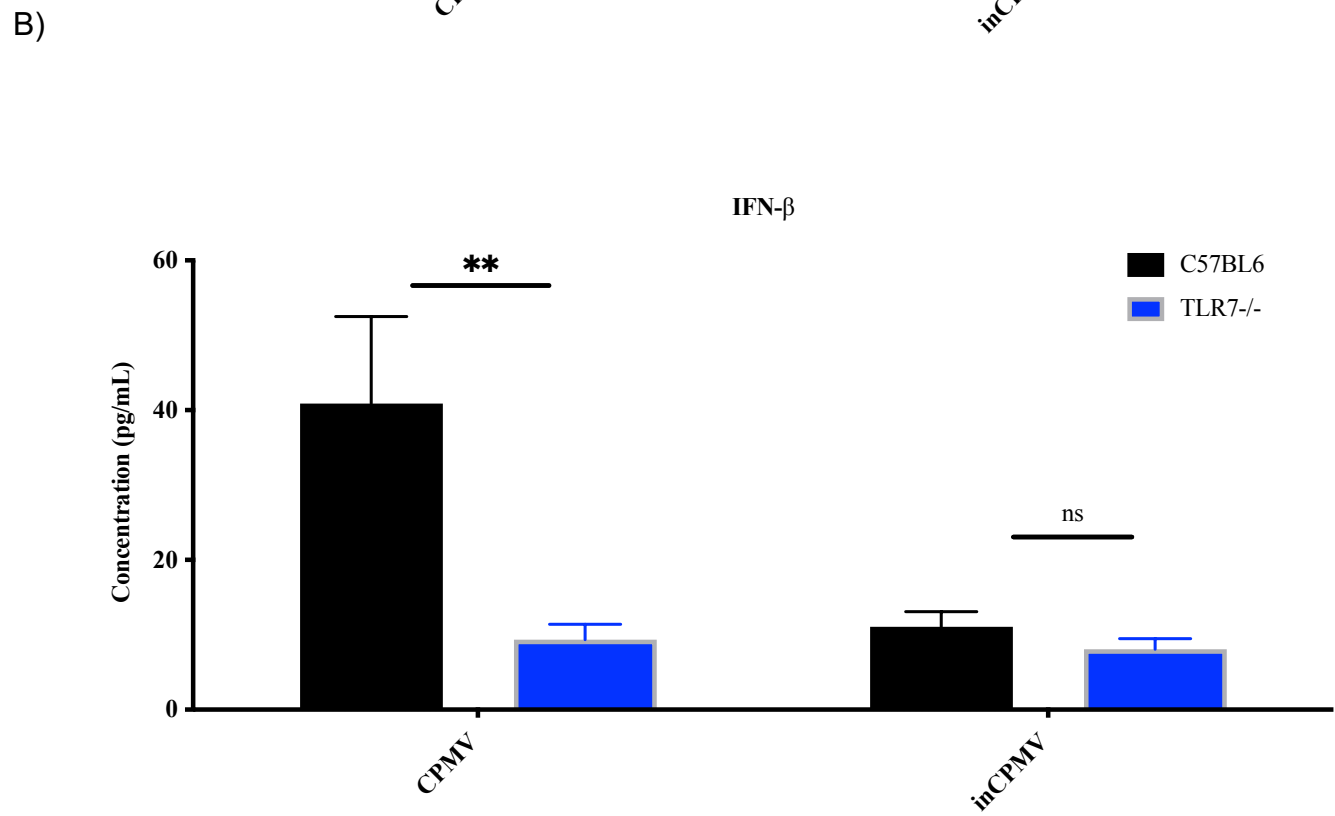

**Figure S1. CPMV vs. inCPMV leads to higher induction of IL-6 and IFN- $\beta$  due to additional TLR7 stimulation by packaged ssRNA cargo.**

Direct comparison of splenocyte assays established previously<sup>19</sup> set up from C57BL6 and TLR7-/- mice (n=3/strain) respectively **from Figs. 3A and 3D. A)** Supernatant was analyzed by IL-6 ELISA and **B)** IFN- $\beta$  ELISA. Data for bar graphs were calculated using unpaired Student's *t*-test with  $p < 0.05$  as \*,  $p < 0.01$  as \*\*, and  $p < 0.001$  as \*\*\*.
